# Supplementary material
Source: publisher figshare collection journal article supplement (https://springernature.figshare.com/ndownloader/files/17505065)
Supplement: Supplementary file 1 [file 17505065]

## Sheet: 30-day-re-admitted
SBP	DBP	HbA1c	AV1	SD	Cr	Tchol	HDL	LDL	TG	LOS
119	62	6.5	110	66	0.7	144	41	90	78	10
142	73	8.6	141	37	1.1	157	64	80	45	6
110	56	8.8	155	95	1.8	182	47	115	125	5
134	77	8.6	137	77	1.1	193	52	127	59	12
135	78	7.5	152	72	0.7	184	49	121	92	7
138	77	8.7	133	65	1.1	129	42	68	114	5
116	70	9	121	54	1	154	56	88	68	6
128	71	8.9	133	47	1.2	166	27	95	280	13
200	100	6.8	149	126	0.8	231	44	156	115	15
133	70	6.3	123	77	0.9	197	35	124	305	10
122	66	9	145	65	1.2	153	34	99	107	5
131	77	7.6	140	54	1.2	137	48	72	94	6
132	81	7.3	136	35	0.9	173	49	101	141	9
150	80	6.4	113	112	0.9	192	59	120	94	9
155	85	9.2	159	76	0.6	197	40	143	122	5
159	83	9	181	54	0.8	222	61	138	150	11
148	87	8.6	141	135	1.3	174	30	105	394	9
151	90	6.8	88	99	8.5	196	55	111	163	7
158	87	8.9	133	67	0.9	172	55	105	49	5
177	105	9.5	149	145	0.8	178	43	114	120	17
138	76	10.6	211	88	0.8	248	43	168	223	6
123	77	6.8	115	78	1.1	135	54	73	46	6
124	80	7.6	159	58	1	168	56	101	102	13
158	90	8.3	145	99	0.8	210	48	135	153	6
123	68	8.8	154	89	0.8	158	46	103	81	17
166	92	9.8	172	115	0.9	246	23	136	570	17
172	85	8.9	149	65	1.1	204	50	128	162	9
130	76	9.7	140	87	1.2	260	56	177	158	12
135	78	8.4	122	56	0.8	180	36	102	280	5
149	87	9	136	88	0.8	172	56	105	55	8
159	99	8.6	145	68	0.7	199	50	132	194	9
167	98	7	169	68	1.2	153	43	90	170	11
117	63	7.6	135	99	1.1	231	32	183	118	5
142	72	8	145	78	0.8	192	51	117	133	8
149	83	7.9	153	167	0.8	186	61	115	74	7
153	88	8.6	191	77	0.7	196	51	128	133	5
118	58	8.7	139	56	1.3	162	62	76	78	7
127	68	6.7	112	99	1.2	193	64	124	41	6
138	91	9	140	65	1	149	58	59	160	9
140	80	7	138	46	1.1	141	43	85	83	13
145	79	7.7	134	57	0.9	206	48	131	224	10
137	76	8.3	160	68	1.2	236	49	152	183	9
150	92	9	147	78	0.9	212	50	143	113	9
128	95	7.5	149	45	1	186	45	124	87	12
134	68	6.7	140	88	0.8	217	46	150	135	13
155	76	9	149	100	1	160	53	92	66	7
190	97	9	162	89	1.3	225	70	138	142	13
100	90	7	112	68	0.9	166	67	98	44	6
112	56	8.7	166	57	0.8	146	45	82	135	5
109	60	10.7	168	136	0.7	163	45	110	73	5
135	80	8.6	156	94	0.9	175	56	108	65	5
140	70	7.3	136	84	1.9	214	48	132	257	5
123	74	6.6	107	90	0.9	165	54	95	52	6
123	65	9	140	104	0.9	190	37	124	171	14
130	72	8	198	70	0.6	193	52	105	244	7
153	63	6.8	112	67	0.7	115	37	55	156	7
152	82	7.3	148	150	1.4	215	55	127	123	9
163	85	9	143	124	0.7	146	44	90	69	13
128	72	8.3	148	83	1.2	126	50	67	63	6
125	62	8.8	154	78	1	221	42	144	255	6
131	70	7.2	122	110	0.9	199	54	114	245	12
145	75	8.8	118	105	1.2	233	49	152	178	10
130	90	8	149	69	1.1	223	51	111	304	10
148	89	8	213	87	1	259	36	133	672	9
157	74	8.1	137	67	2.2	158	45	93	135	12
162	83	8.2	174	90	0.7	222	50	146	177	6
137	84	8.7	175	101	1.4	160	32	82	361	11
110	59	8.6	149	96	0.8	198	47	132	117	6
121	70	9.5	187	49	0.7	184	79	95	41	6
148	78	9	150	89	1.2	166	48	89	139	9
181	89	9	180	138	1.5	160	31	98	189	10
222	89	7.1	218	120	1	274	55	204	143	7
134	64	9	247	88	0.7	225	71	137	117	6
127	65	8	143	97	0.7	191	75	101	121	9
194	101	7.5	219	88	0.8	242	55	161	98	7
123	57	7.5	142	47	1.9	187	50	101	199	8
154	76	8.3	178	77	1.1	252	42	186	124	7
120	69	6.1	147	78	1	149	32	84	221	16
157	91	8.8	175	49	0.8	184	55	121	58	7
143	67	7.6	163	79	1.1	200	56	130	71	5
149	79	8.5	163	107	1.6	170	34	116	127	12
192	101	6.8	167	88	1.3	214	62	122	136	7
127	90	8.5	160	94	1.1	191	56	121	86	5
135	68	9.6	139	78	0.8	193	79	103	96	8
136	80	8.6	215	90	0.9	208	39	148	168	6
140	76	8.4	142	44	1.1	205	44	136	136	6
159	84	7.7	165	104	0.9	144	36	76	220	9
169	96	7.7	153	50	1	199	55	120	147	9
137	65	8	184	105	2	250	42	157	305	11
131	94	7.8	139	88	1.1	249	38	188	236	13
152	98	9	210	90	1	184	36	88	423	10
111	56	8	222	56	1	187	47	118	96	6
121	72	8.8	134	45	0.8	146	36	97	58	7
126	65	8.1	168	133	0.9	132	44	73	78	13
133	62	8	159	77	0.9	165	48	85	203	6
139	85	7.7	141	67	0.8	144			92	13
163	110	9	183	58	1	159	40	102	123	12
113	70	9	181	90	0.8	192	59	112	140	12
146	78	7.9	147	112	2.3	209	44	106	280	12
127	79	9	147	78	0.8	224	38	154	233	8
140	75	6.7	155	89	0.7	158	65	77	117	10
143	69	8	175	73	0.7	204	53	137	68	9
103	58	7.1	155	70	0.8	162	52	101	78	6
131	73	9	188	89	1.4	144	34	75	261	10
156	81	7.8	148	117	0.8	204	49	141	80	7
123	65	8	190	89	0.8	201	47	124	148	8
172	96	7.2	180	38	0.8	176	60	96	105	13
128	74	6.6	173	73	0.7	157	42	102	59	6
146	82	8	139	69	1	173	58	94	80	8
154	75	8.7	188	119	1.1	140	39	89	60	8
153	73	7.6	177	106	1	188	50	123	119	12
117	72	6.9	151	86	0.7	162	57	89	51	6
154	82	8	157	88	0.8	198	52	132	127	6
171	92	9	178	70	0.5	248	41	120	650	9
164	91	8.6	153	92	0.8	159	63	79	79	6
193	100	9	199	92	0.7	227	62	142	127	18
145	77	6.7	156	89	1.1	229	55	155	184	6
130	70	9	210	77	1	162	53	91	58	6
136	68	8.7	169	103	1.1	169	28	98	179	6
176	102	7.1	158	78	0.8	209	37	147	126	16
183	87	9	175	65	1.4	150	62	73	54	6
122	73	8.7	156	56	1	158	56	86	123	5
135	82	8.8	198	57	0.9	141	57	72	75	10
110	70	8.9	167	76	0.5	210	37	143	224	7
120	65	8.7	203	63	0.9	181	46	75	347	9
110	70	7.9	147	88	1.4	220	44	144	185	12
137	83	9	200	64	0.9	208	44	146	104	11
125	67	9	219	40	1	151	31	100	83	9
138	68	8.1	160	40	0.8	202	52	128	102	6
173	100	8	155	99	1.2	246	53	162	93	6
148	74	7.3	150	84	1.9	136	22	92	169	16
131	66	8.3	163	49	0.9	173	45	104	154	10
136	80	9.2	208	43	0.7	245	48	170	165	14
179	110	9.1	129	65	1.5	121	40	65	88	10
170	95	8.3	170	44	0.8	212	49	134	149	15
114	69	8.4	143	47	1.2	219	40	149	236	14
146	81	8.8	175	57	0.9	283	50	208	139	8
162	96	8	156	127	1.1	228	46	175	84	7
129	67	7.7	147	48	0.9	160	44	101	82	6
113	74	8	166	88	0.9	150	34	100	110	6
134	68	8	177	92	0.8	195	50	131	130	5
143	73	8	154	92	0.7	183	51	118	63	7
165	80	8.4	184	116	1.4	264	32	68	848	8
180	88	7.8	144	49	0.9	177	55	110	100	10
144	81	8.3	226	52	0.7	207	59	124	104	11
140	90	8.4	185	52	0.9	223	55	145	151	10
154	79	8.3	183	54	0.8	189	37	129	152	6
141	85	8.1	144	77	1.4	130	36	76	97	11
166	94	8.9	171	54	0.9	207	39	116	259	9
135	75	8.4	138	55	0.7	238	54	158	122	7
138	63	10	213	56	1.2	134	39	76	130	7
140	81	7	214	57	0.8	179	88	65	182	6
135	78	8.4	159	60	0.9	398	57	301	219	8
146	71	7.4	165	60	1.3	228	44	158	142	6
155	95	8	192	59	1.3	142	33	86	152	5
164	90	8.7	187	67	0.7	239	45	171	110	11
154	77	8.8	175	112	1.1	228	36	162	167	9
124	63	10.2	212	62	0.6	244	72	152	82	6
137	70	8.1	202	62	0.8	191	36	130	120	8
135	88	7.1	132	62	0.8	385	58	271	332	5
205	112	8.9	138	63	1.3	235	56	159	138	10
132	72	7.6	149	67	0.7	218	32	127	373	10
142	78	8.8	212	67	1.3	216	37	139	255	9
155	77	8.3	168	69	1.2	123	35	61	230	9
138	74	8	189	70	0.9	140	44	74	105	8
147	87	9	232	72	1	218	80	119	78	9
111	70	8	207	72	0.8	257	48	189	136	6
115	75	8	194	74	0.8	204	58	135	85	6
118	80	8.9	198	77	0.7	167	37	117	68	6
170	90	8	165	77	1.7	165	72	80	111	16
120	80	9	153	81	1	126	40	73	117	8
132	70	8	161	82	1.1	117	52	54	55	6
138	74	7.7	181	83	1.9	174	27	110	188	13
162	85	9	183	85	0.8	181	42	134	71	6
130	80	8.4	176	87	0.9	189	63	106	112	9
132	79	11	210	89	0.6	162	60	89	107	6
140	66	8.6	201	96	1.2	173	35	121	81	6
191	87	10	248	98	1.9	319	44	242	141	8
128	76	9	168	109	0.9	212	44	142	130	7
133	79	7.8	144	110	0.8	147	53	83	45	5
120	68	9	168	113	0.8	157	39	101	69	5
122	69	8	192	116	0.9	134	49	68	81	8
142	81	8.6	160	118	1.2	137	45	81	84	5
151	78	9	213	121	1	179	36	102	371	10
145	77	8.9	163	126	1.1	124	38	74	85	7
153	79	8.9	193	131	1.3	171	56	101	92	5
133	77	10	200	134	1.5	174	39	105	222	8
126	79	10.5	222	135	0.9	210	62	134	54	6
130	77	9	201	143	0.9	145	47	86	72	6
135	80	8.2	177	156	1.1	134	64	61	59	8
166	99	9	188	167	0.9	200	39	140	207	15
124	70	8.8	166	180	1	197	39	125	169	7
134	88	8.3	193	184	1.1	228	38	130	245	10
126	80	9.3	200	199	0.8	287	62	197	104	6
132	88	8.9	200	210	1.1	161	24	104	220	6
150	83	9	187	177	1.2	151	44	86	81	11
152	76	8.6	142	118	1	193	60	129	78	9
112	80	9	126	113	0.9	135	33	83	104	5
141	88	10.5	210	45	1.9					6
133	78	10	200	45	1.2	201	63	124	89	11
144	74	9.6	188	44	1.2	188	48	123	150	11
130	83	8.8	173	127	0.8	185	55	100	145	7
135	88	8.7	149	76	1	193	56	119	149	10
169	79	9	195	30	1.7	242	37	152	275	14
144	80	8.3	177	44	2.4	207	33	147	240	7
130	70	10	200	32	0.8	195	46	130	116	6

## Sheet: control-group
SBP	DBP	HbA1c	AV1	SD	Cr	Tchol	HDL	LDL	TG	LOS
152	76	6.7	135	28	1	193	60	129	78	6
112	64	7	118.6	24	0.9	135	33	83	104	5
141	88	6.9	176	18	1.9	153	39	91	156	5
116	78		142.6	20	1.2	201	63	124	89	13
144	74	7.6	130.6	27	1.2	188	48	123	150	14
130	83	5.7	165.6	27	0.8	185	55	100	145	6
135	66	7.9	142	30	1	193	56	119	149	6
169	79	7	187.6	40	1.7	242	37	152	275	7
114	63	7.3	185	44	2.4	207	33	147	240	5
130	70	7	153.6	32	0.8	195	46	130	116	4
139	84	6.7	152	34	0.8	153	39	91	156	11
130	79		138	36	1.3	183	46	112	154	4
174	86	6.1	119.6	40	0.9	211	46	140	144	4
127	78		179	41	1.2	226	40	144	202	5
133	81	7.6	139.6	42	1.5	210	36	149	161	8
131	69		152.6	43	1	224	64	152	68	8
125	73	7	150.6	50	0.9	209	69	129	91	5
169	76	7	162	52	1	162	55	74	261	8
112	68	7.5	165.6	54	1	161	46	88	203	11
84	58		164.6	57	0.9	158	34	87	212	4
137	79	7.4	141.6	59	1	146	39	72	201	4
161	88	7	185.6	60	0.9	215	41	109	487	9
138	66		168.6	62	0.8					5
141	75	6.9	256	64	1.4	163	61	91	51	5
126	67	7	159.6	66	6.6	229	36	164	189	8
177	102	6.8	139	70	4	306	53	209	290	4
116	74	6.7	188	72	1	161	44	94	100	10
129	69	6.1	140.6	75	1	205	68	111	169	5
163	91		181.6	75	0.8	143	43	84	113	11
122	62	8.2	149.6	83	0.7	202	86	113	82	5
132	80	9.8	167.6	86	1.7	199	30	142	179	4
109	79		166.6	88	1	202	36	137	163	4
160	93	8.2	141.6	46	1.1	188	66	111	51	4
122	71		159.6	41	1.2	210	39	150	135	6
175	81	7	164.6	54	0.7	191	55	120	78	8
141	70	7.3	154.6	64	1	163	35	117	113	9
147	87		156	56	0.7	127	45	65	95	12
111	63	7	126.6	89	0.6	102	40	41	103	6
121	72	8.3	163.6	88	0.9	211	32	158	94	10
151	91	8	152.6	67	0.9	207	47	141	132	5
114	62		118	18	1.4	186	37	123	189	6
119	66	7	133	18	0.7	223	48	133	270	6
143	76		127.6	19	1	178	50	110	145	6
141	82	6.8	127	22	0.9	185	40	120	178	5
223	112	7.4	135	16	2.7	193	51	117	147	5
118	64		128	14	0.7	303	54	233	153	9
135	76	7.8	126	14	0.7	137	38	71	176	6
114	63		171	15	1.4	187	42	126	147	8
165	84	7	138	19	1.3	152	38	98	71	5
186	94	7.3	120.6	20	1.6	164	47	95	97	6
132	80	6.5	157	22	1.2	200	45	144	64	6
150	90		125.6	23	1.1	206	33	141	223	5
157	85	9	140	23	0.8	192	50	124	153	5
169	92	6	128.6	24	0.9	198	55	131	79	7
126	67	7	126	24	0.8	191	39	131	162	6
106	50		153	28	0.8	257	57	166	110	6
220	101	8	129	28	1.4	204	43	137	147	10
160	88	9.5	127	36	0.9	172	38	124	81	5
129	72	6.8	201	37	1.3	193	39	126	170	6
159	85		215	37	1.9	180	52	102	112	5
159	76	7	188.6	39	0.8	255	46	162	323	10
158	85		143	39	0.7	201	52	134	152	5
150	72	6	177.6	40	0.9	165	31	100	270	5
177	97		137	40	1.4	272	67	178	134	9
133	67	7	182.6	45	1.3	174	35	88	276	6
149	76	7.4	130.6	36	1.2	186	54	121	57	6
143	99	6	153	36	0.7	164	56	91	114	5
129	84	7.1	136	34	0.9	230	52	159	84	7
188	119	8	124	42	1	195	55	124	107	10
142	88		205	44	1	172	33	115	198	5
167	87	7	147.6	45	0.6	207	41	134	197	5
188	98	8	176.6	34	1.2	213	47	138	129	7
110	59		141	44	1	148	59	82	56	9
120	63	9.2	188	45	1.1	150	40	95	96	7
183	96	7	190	45	1.7	246	74	79	278	4
123	75	8	181.6	36	0.6	145	51	75	110	7
122	64		128	42	1.5	190	32	101	234	6
179	103	6	196	42	0.8	182	67	111	45	9
154	79	7	167.6	43	0.8	202	58	126	114	8
155	97	8	154.6	44	0.7	228	36	159	213	7
163	99		169.6	36	0.7	220	68	135	86	8
139	76	7	200.6	47	1.1	195	60	132	75	8
136	75	7	125	48	0.8	159	45	106	75	8
120	73		145.6	45	0.9	131	30	84	176	5
130	90	7.2	178.6	48	1.2	155	48	82	190	7
136	80	8	164.6	55	1	161	42	107	97	7
157	89		168	44	0.8	145	70	63	88	6
128	68	7	203.6	45	1.2	154	32	119	67	10
139	77	8	190.6	49	1	157	38	89	213	7
124	65	7	231	37	3	198	56	113	132	8
102	61		201.6	50	0.9	155	42	100	64	7
148	65	9	171	45	1.2	168	41	95	208	10
139	82	8.9	158	50	1.4	106	39	55	50	11
129	76		135.6	52	0.8	152	50	89	66	6
157	98	9.4	199.6	52	0.8	242	37	165	126	9
121	64		137.6	56	0.7	165	51	97	95	5
121	69		180.6	52	0.7	207	58	138	119	6
136	65	10	190	45	0.6	198	77	107	47	6
151	70	7	188.6	45	0.7	183	32	116	191	9
145	92	11.2	159	51	0.6	206	48	136	117	8
140	86	9.6	148.6	55	0.7	192	42	120	188	5
183	100		155.6	53	0.9	167	46	108	91	6
212	115	8.8	157.6	51	2.1	313	46	196	360	5
116	72		157	55	0.9	172	43	123	147	11
115	80	7.2	222	55	1.4	210	43	141	136	5
148	74	9.6	180	34	1.2	156	39	91	165	9
135	73		149	54	1.3	265	43	199	169	7
153	76	8.9	163.6	34	0.9	177	46	90	304	7
97	59		145	43	0.7	171	75	86	73	5
169	78	11.1	143.6	54	0.9	154	60	82	56	7
144	73		159	45	0.9	199	48	135	145	13
155	71		139	57	1.1	204	40	150	89	5
144	85	9.9	125	57	0.9	281	46	193	139	12
130	75	10.2	148	59	1.2	140	43	82	107	10
177	82		184	59	1.5	161	34	100	137	10
139	91		165	61	1	186	54	116	93	6
168	96	8.6	145	61	0.9	170	34	101	212	10
130	80		154	45	0.7	198	50	128	101	6
135	79	7.9	133.6	62	1	172	58	106	48	7
160	100		198.6	62	0.7	153	32	99	117	9
118	63	10.3	234	64	1.3	211	44	125	299	7
173	75		190	64	1	198	73	103	136	7
122	77		175	66	0.9	160	44	78	274	6
118	69	11.4	200.6	66	0.9	208	42	138	207	7
173	80		138.6	45	1.2	214	45	142	122	7
147	69		153.6	34	2	196	45	111	196	9
126	78	8.5	197	54	0.9	255	47	185	179	6
127	73		184	34	0.6	222	54	144	127	7
155	92	8.9	167.6	54	1.3	216	53	155	120	4
116	71	9.3	127.6	20	1	233	44	168	104	4
142	84		171.6	45	0.6	221	53	135	241	7
148	79		174.6	34	0.8	227	47	146	197	6
131	77	9.8	210.6	21	1	225	35	149	321	10
179	92		223	46	1	201	66	119	83	7
145	82	8.7	189.6	46	0.8	151	38	88	109	5
126	86		132	54	0.9	124	52	64	39	4
132	90	7.9	184	89	0.9	214	36	154	134	10
136	85		208.6	34	0.7	150	50	78	93	8
146	83		234	34	2.1	223	35	144	194	6
183	90	9.2	128.6	24	1.2	224	35	159	151	6
124	86		139.6	53	1.3	155	46	86	174	6
162	94	8.9	156.6	23	1.1	146	59	79	53	10
145	83		142.6	23	1	179	50	108	62	6
163	91	9.7	160.6	35	1.1	185	37	123	145	6
124	77	8	155.6	35	0.6	141	59	70	94	5
114	67		223	45	0.8	201	50	133	131	5
177	96	8	157.6	23	1.2	160	52	85	134	4
146	73		213.6	34	1	182	32	126	112	5
175	98	9.2	146	23	1	159	50	94	88	5
115	66		136.6	34	0.9	184	41	111	212	4
149	82		174.6	45	1.1	209	51	141	73	10
168	91	8.7	133.6	35	1.2	181	81	86	77	4
148	83		194	25	1.2	152	45	95	77	8
120	72	10.5	150	45	0.8	243	55	172	142	5
137	68	9	170	35	2	123	49	56	108	5
162	99		162	23	0.9	217	39	153	165	5
141	72	8	200.6	34	0.8	225	31	171	174	4
138	67	6.6	180.6	25	1	178	37	109	262	4
126	77	8.6	226.6	45	1.2	175	41	122	68	11
155	88		189.6	23	0.7	171	72	87	62	9
132	76	10.2	160	23	1.2	193	37	113	264	10
109	56	9	163	23	1.1	140	61	64	100	11
111	64		150.6	32	1.2	159	46	97	142	10
115	76	9.1	182.6	34	0.7	206	56	141	36	9
100	68		205.6	35	0.8	187	88	82	91	9
120	81	7	147.6	35	1	224	47	147	164	5
105	70		157.6	35	0.6	171	35	113	112	8
142	80	9.4	159.6	36	1.1	215	51	135	120	5
157	102		144	36	0.8	128	33	80	67	7
156	70	10	170	38	1.2	157	67	64	121	4
140	90		142	41	1.2	142	36	82	119	4
137	68	10	144.6	42	1.1	161	37	105	112	7
194	87		168.6	43	0.6	181	44	123	63	5
116	70	11.4	171.6	44	1.8	181	39	97	304	5
147	80		217	43	0.9	144	48	81	89	6
161	77		183	34	1.7	211	62	120	90	6
135	55	8.9	169.6	42	0.8	173	22	68	469	5
210	100		164.6	33	3.1	250	59	177	98	4
180	90	9	173.6	23	3.5	247	42	170	250	5
124	68		168.6	43	0.7	157	31	106	114	5
200	100	8	186.6	35	1	216	41	151	110	4
134	59		217	35	1.2	199	32	139	165	4
121	70		166.6	35	0.9	174	44	112	111	10
114	56	7.9	172.6	25	1	143	29	75	190	6
104	70		177	22	1.1	198	67	120	55	5
135	73		165	34	1.3	240	42	182	101	5
141	75	10	226	16	1.5	189	37	105	224	4
143	86	9	164	17	0.8	267	45	187	292	5
144	74		179.6	16	1.3	191	22	136	214	6
158	88		218.6	18	1.2	167	45	101	132	6
140	76	9	147.6	34	1.5	149	29	82	149	6
151	90	8.9	177	17	1.2	184	30	123	158	5
158	86		174	27	0.9	159	42	91	183	5
133	61	9	181	16	1.2	200	58	108	110	6
137	75		176.6	16	0.9	196	33	135	201	4
127	72	11.6	147.6	27	1	291	43	234	106	5
124	67		172	23	0.9	292	42	107	867	5
139	86	9.6	191	18	1	172	40	110	144	5
114	72		196	57	1	220	63	145	94	5
233	120	10	202.6	44	1.9	237	44	166	171	6
110	70		160.6	56	0.8	188	34	131	88	4
130	80	8.9	152	36	1.3	193	57	112	161	4
100	67		196.6	46	0.8	224	48	163	70	4
156	79	8.9	178	56	0.7	224	41	148	261	4
142	90		155	25	0.9	206	48	130	208	5
89	46	9	207	45	0.8	178	76	88	74	6
135	66	7.9	142	30	1	193	56	119	149	6
169	79		187.6	40	1.7	242	37	152	275	7
114	63	7.3	185	44	2.4	207	33	147	240	5
130	70		153.6	32	0.8	195	46	130	116	4
139	84	6.7	152	34	0.8	153	39	91	156	12
130	79		138	36	1.3	183	46	112	154	4
174	86	6.1	119.6	40	0.9	211	46	140	144	6
127	78	6.6	179	41	1.2	226	40	144	202	5
102	61		201.6	50	0.9	155	42	100	64	6
148	65	9	171	50	1.2	168	41	95	208	10
139	82	8.9	158	50	1.4	106	39	55	50	11
129	76		135.6	52	0.8	152	50	89	66	6
157	98	9.4	199.6	52	0.8	242	37	165	126	14
121	64		137.6	52	0.7	165	51	97	95	5
121	69		180.6	52	0.7	207	58	138	119	6
136	65	10	190	52	0.6	198	77	107	47	5
151	70		188.6	53	0.7	183	32	116	191	9
89	46	9	207	35	0.8	178	76	88	74	6
135	66	7.9	142	29	1	193	56	119	149	6
169	79		187.6	40	1.7	242	37	152	275	7
114	63	7.3	185	44	2.4	207	33	147	240	5
130	70		153.6	32	0.8	195	46	130	116	4
139	84	6.7	152	34	0.8	153	39	91	156	12
130	79		138	36	1.3	183	46	112	154	6
174	86	6.1	119.6	40	0.9	211	46	140	144	6
127	78		179	41	1.2	226	40	144	202	5
102	61		201.6	50	0.9	155	42	100	64	6
183	96		190	46	1.7	246	74	79	278	6
123	75	8	181.6	44	0.6	145	51	75	110	7
122	64		128	46	1.5	190	32	101	234	5
179	103	6	196	40	0.8	182	67	111	45	9
154	79	7	167.6	47	0.8	202	58	126	114	8
155	97	8	154.6	46	0.7	228	36	159	213	6
163	99		169.6	23	0.7	220	68	135	86	8
139	76	7	200.6	34	1.1	195	60	132	75	8
136	75	7	125	23	0.8	159	45	106	75	8
120	73		145.6	34	0.9	131	30	84	176	5
130	90	7.2	178.6	24	1.2	155	48	82	190	7
136	85		208.6	26	0.7	150	50	78	93	8
146	83		234	36	2.1	223	35	144	194	6
183	90	9.2	128.6	36	1.2	224	35	159	151	6
124	86		139.6	45	1.3	155	46	86	174	6
162	94	8.9	156.6	24	1.1	146	59	79	53	10
145	83		142.6	35	1	179	50	108	62	6
163	91	9.7	160.6	14	1.1	185	37	123	145	6
116	78		142.6	20	1.2	201	63	124	89	11
144	74	7.6	130.6	27	1.2	188	48	123	150	9
130	83	5.7	165.6	27	0.8	185	55	100	145	6
135	66	7.9	142	30	1	193	56	119	149	6
169	79		187.6	40	1.7	242	37	152	275	7
114	63	7.3	185	44	2.4	207	33	147	240	5
130	70		153.6	32	0.8	195	46	130	116	5
135	70	7.2	169.6	56	1.1	134	64	61	59	7
166	99		148.6	17	0.9	200	39	140	207	13
124	70		159	20	1	197	39	125	169	6
111	64	7.3	185.6	14	1.1	228	38	130	245	0
126	70		206.6	29	0.8	287	62	197	104	7
132	72	8.9	207.6	25	1.1	161	24	104	220	6
150	83	8	180	28	1.2	151	44	86	81	10
152	76	6.7	135	40	1	193	60	129	78	8
112	64		118.6	13	0.9	135	33	83	104	5
141	88	6.9	176	18	1.9					4
116	78		142.6	20	1.2	201	63	124	89	10
144	74	7.6	130.6	27	1.2	188	48	123	150	10
130	83	5.7	165.6	27	0.8	185	55	100	145	8
135	66	7.9	142	30	1	193	56	119	149	9
136	80		201	43	0.7	245	48	170	165	12
179	110	9.1	122	44	1.5	121	40	65	88	9
170	95	8.3	163	44	0.8	212	49	134	149	14
114	69		135.6	46	1.2	219	40	149	236	13
146	81		167.6	44	0.9	283	50	208	139	7
162	96	6.8	149	46	1.1	228	46	175	84	6
129	67	6.7	140	43	0.9	160	44	101	82	6
103	74		129.6	37	0.9	150	34	100	110	6
134	68		127.6	42	0.8	195	50	131	130	6
143	73	8	146.6	47	0.7	183	51	118	63	6
165	80		177	39	1.4	264	32	68	848	7
180	88		137	49	0.9	177	55	110	100	9
144	81	8.3	219	52	0.7	207	59	124	104	10
152	76	6.7	135	28	1	193	60	129	78	7
112	64		118.6	13	0.9	135	33	83	104	5
141	88	6.9	176	18	1.9					4
116	78		142.6	20	1.2	201	63	124	89	9
144	74	7.6	130.6	27	1.2	188	48	123	150	9
130	83	5.7	165.6	27	0.8	185	55	100	145	6
135	66	7.9	142	30	1	193	56	119	149	9
136	80		201	43	0.7	245	48	170	165	13
179	110	9.1	122	44	1.5	121	40	65	88	9
170	95	8.3	163	44	0.8	212	49	134	149	14
89	46	9	207	58	0.8	178	76	88	74	6
135	66	7.9	142	30	1	193	56	119	149	6
169	79		187.6	40	1.7	242	37	152	275	7
114	63	7.3	185	44	2.4	207	33	147	240	5
130	70		153.6	32	0.8	195	46	130	116	4
139	84	6.7	152	34	0.8	153	39	91	156	11
130	79		138	36	1.3	183	46	112	154	6
174	86	6.1	119.6	40	0.9	211	46	140	144	6
127	78	7	179	41	1.2	226	40	144	202	5
102	61		201.6	50	0.9	155	42	100	64	6
183	96		190	46	1.7	246	74	79	278	6
123	75	8	181.6	46	0.6	145	51	75	110	7
122	64		128	46	1.5	190	32	101	234	5
143	73	8	146.6	47	0.7	183	51	118	63	6
165	80		177	49	1.4	264	32	68	848	7
180	88		137	49	0.9	177	55	110	100	9
144	81	8.3	219	52	0.7	207	59	124	104	10
140	90		178	52	0.9	223	55	145	151	9
154	79		176	54	0.8	189	37	129	152	5
141	85	8.1	137	54	1.4	130	36	76	97	10
166	94	5.9	163.6	54	0.9	207	39	116	259	8
135	75		131	55	0.7	238	54	158	122	6
118	63	10	169	56	1.2	134	39	76	130	6
140	81	6	207	57	0.8	179	88	65	182	6
170	95	8.3	163	44	0.8	212	49	134	149	14
114	69		135.6	46	1.2	219	40	149	236	13
146	81		167.6	46	0.9	283	50	208	139	7
162	96	6.8	149	46	1.1	228	46	175	84	6
129	67	6.7	140	47	0.9	160	44	101	82	4
103	74	8	129.6	47	0.9	150	34	100	110	6
134	68		127.6	47	0.8	195	50	131	130	5
143	73	8	146.6	47	0.7	183	51	118	63	6
165	80		177	49	1.4	264	32	68	848	7
180	88		137	49	0.9	177	55	110	100	9
154	79		176	54	0.8	189	37	129	152	5
141	85	8.1	137	54	1.4	130	36	76	97	10
166	94	5.9	163.6	54	0.9	207	39	116	259	8
135	75		131	55	0.7	238	54	158	122	6
118	63	10	169	56	1.2	134	39	76	130	6
140	81	6	207	57	0.8	179	88	65	182	6
170	95	8.3	163	44	0.8	212	49	134	149	14
114	69		135.6	46	1.2	219	40	149	236	13
140	76	9	147.6	13	1.5	149	29	82	149	6
151	90	8.9	177	12	1.2	184	30	123	158	6
158	86		174	17	0.9	159	42	91	183	5
133	61	9	181	16	1.2	200	58	108	110	6
137	75		176.6	17	0.9	196	33	135	201	6
127	72	9.8	147.6	17	1	291	43	234	106	6
124	67		172	14	0.9	292	42	107	867	6
139	86	9.6	191	16	1	172	40	110	144	6
114	72		196	18	1	220	63	145	94	6
233	120	10	202.6	16	1.9	237	44	166	171	6
110	70		160.6	19	0.8	188	34	131	88	6
130	80	8.9	152	18	1.3	193	57	112	161	5
100	67		196.6	21	0.8	224	48	163	70	4
156	79	8.9	178	22	0.7	224	41	148	261	4
142	90		155	25	0.9	206	48	130	208	6
89	46	9	207	37	0.8	178	76	88	74	6
135	66	7.9	142	30	1	193	56	119	149	6
169	79		187.6	40	1.7	242	37	152	275	7
129	67	6.7	140	47	0.9	160	44	101	82	6
103	74		129.6	34	0.9	150	34	100	110	6
134	68		127.6	45	0.8	195	50	131	130	6
143	73	8	146.6	45	0.7	183	51	118	63	6
165	80		177	34	1.4	264	32	68	848	7
180	88		137	49	0.9	177	55	110	100	9
144	81	8.3	219	52	0.7	207	59	124	104	10
140	90		178	34	0.9	223	55	145	151	9
154	79		176	54	0.8	189	37	129	152	5
141	85	8.1	137	33	1.4	130	36	76	97	10
166	94	5.9	163.6	54	0.9	207	39	116	259	8
135	75		131	55	0.7	238	54	158	122	6
118	63	10	169	56	1.2	134	39	76	130	6
140	81	6	207	44	0.8	179	88	65	182	6
135	78	7	152	36	0.9	398	57	301	219	7
146	71		158	59	1.3	228	44	158	142	5
155	95	8	184.6	44	1.3	142	33	86	152	4
164	90	8.7	179.6	32	0.7	239	45	171	110	10
154	77		168	31	1.1	228	36	162	167	8
104	63		167.6	23	0.6	244	72	152	82	6
137	70	7.1	169.6	35	0.8	191	36	130	120	7
135	70	6.1	194.6	24	0.8	385	58	271	332	5
205	112		131	42	1.3	235	56	159	138	9
132	72	7.6	205	55	0.7	218	32	127	373	9
142	78		142	45	1.3	216	37	139	255	8
155	77	7.3	161	69	1.2	123	35	61	230	8
138	74		181.6	70	0.9	140	44	74	105	8
147	70		225	72	1	218	80	119	78	8
111	61	6	199.6	44	0.8	257	48	189	136	6
105	75		187	14	0.8	204	58	135	85	6
108	64	8.9	190.6	32	0.7	167	37	117	68	6
170	90	7	157.6	13	1.7	165	72	80	111	14
110	70		145.6	32	1	126	40	73	117	7
169	79		187.6	40	1.7	242	37	152	275	7
114	63	7.3	185	44	2.4	207	33	147	240	6
130	70		153.6	32	0.8	195	46	130	116	5
139	84	6.7	152	34	0.8	153	39	91	156	13
130	79		138	36	1.3	183	46	112	154	6
174	86	6.1	119.6	40	0.9	211	46	140	144	6
127	78		179	41	1.2	226	40	144	202	5
133	81	7.6	139.6	42	1.5	210	36	149	161	8
131	69		152.6	43	1	224	64	152	68	8
125	73		150.6	50	0.9	209	69	129	91	6
169	76	7	162	52	1	162	55	74	261	8
112	68	7.5	165.6	54	1	161	46	88	203	13
84	58		164.6	57	0.9	158	34	87	212	4
137	79	7.4	141.6	59	1	146	39	72	201	4
161	88		185.6	60	0.9	215	41	109	487	10
138	66		168.6	62	0.8					6
141	75	6.9	256	22	1.4	163	61	91	51	6
108	64	8.9	190.6	77	0.7	167	37	117	68	6
170	90	7	157.6	33	1.7	165	72	80	111	14
110	70		145.6	52	1	126	40	73	117	7
132	70		154	42	1.1	117	52	54	55	6
138	74	7.7	173.6	32	1.9	174	27	110	188	6
162	85		176	45	0.8	181	42	134	71	6
120	80	8.4	168.6	45	0.9	189	63	106	112	8
132	79		203	25	0.6	162	60	89	107	6
130	66	7.6	194	14	1.2	173	35	121	81	5
191	87		240.6	98	1.9	319	44	242	141	7
118	76		161	109	0.9	212	44	142	130	6
133	79	5.8	155	36	0.8	147	53	83	45	4
110	68		160.6	24	0.8	157	39	101	69	4
112	69		184.6	25	0.9	134	49	68	81	7
142	81	7.6	153	44	1.2	137	45	81	84	4
151	78	6.7	205.6	35	1	179	36	102	371	9
125	67		156	67	1.1	124	38	74	85	6
123	79	8.9	186	100	1.3	171	56	101	92	4
94	55		181	112	1.5	174	39	105	222	7
126	79	6.5	214.6	113	0.9	210	62	134	54	6
130	77		193.6	43	0.9	145	47	86	72	5
135	70	7.2	169.6	56	1.1	134	64	61	59	7
166	99		148.6	66	0.9	200	39	140	207	13
124	70		159	80	1	197	39	125	169	6
111	64	7.3	185.6	83	1.1	228	38	130	245	9
126	70		206.6	34	0.8	287	62	197	104	6
132	72	8.9	207.6	150	1.1	161	24	104	220	6
150	83	8	180	78	1.2	151	44	86	81	10
152	76	6.7	135	54	1	193	60	129	78	8
112	64		118.6	45	0.9	135	33	83	104	5
141	88	6.9	176	55	1.9					6
116	78		142.6	20	1.2	201	63	124	89	10
144	74	7.6	130.6	27	1.2	188	48	123	150	11
130	83	5.7	165.6	27	0.8	185	55	100	145	6
123	75	8	181.6	46	0.6	145	51	75	110	7
122	64		128	46	1.5	190	32	101	234	5
143	73	8	146.6	47	0.7	183	51	118	63	6
165	80	7	177	49	1.4	264	32	68	848	7
180	88		137	49	0.9	177	55	110	100	9
144	81	8.3	219	52	0.7	207	59	124	104	10
140	90		178	52	0.9	223	55	145	151	9
154	79		176	54	0.8	189	37	129	152	5
141	85	8.1	137	54	1.4	130	36	76	97	10
166	94	5.9	163.6	54	0.9	207	39	116	259	8
135	75		131	55	0.7	238	54	158	122	6
118	63	10	169	56	1.2	134	39	76	130	6
140	81	6	207	57	0.8	179	88	65	182	7
127	78	7	179	41	1.2	226	40	144	202	5
102	61		201.6	50	0.9	155	42	100	64	7
183	96		190	46	1.7	246	74	79	278	7
123	75	8	181.6	46	0.6	145	51	75	110	7
122	64		128	46	1.5	190	32	101	234	5
179	103	6	196	46	0.8	182	67	111	45	9
154	79	7	167.6	47	0.8	202	58	126	114	8
155	97	8	154.6	47	0.7	228	36	159	213	6
163	99		169.6	47	0.7	220	68	135	86	8
139	76	7	200.6	47	1.1	195	60	132	75	8
136	75	7	125	48	0.8	159	45	106	75	8
120	73		145.6	48	0.9	131	30	84	176	5
130	90	7.2	178.6	48	1.2	155	48	82	190	7
136	85	6.7	208.6	92	0.7	150	50	78	93	8
146	83		234	93	2.1	223	35	144	194	7
114	63	7.3	185	44	2.4	207	33	147	240	5
130	70		153.6	32	0.8	195	46	130	116	5
139	84	6.7	152	34	0.8	153	39	91	156	16
130	79		138	36	1.3	183	46	112	154	7
174	86	6.1	119.6	40	0.9	211	46	140	144	7
127	78		179	41	1.2	226	40	144	202	5
133	81	7.6	139.6	42	1.5	210	36	149	161	8
131	69		152.6	43	1	224	64	152	68	8
125	73		150.6	50	0.9	209	69	129	91	7
169	76	7	162	52	1	162	55	74	261	8
112	68	7.5	165.6	54	1	161	46	88	203	11
84	58		164.6	57	0.9	158	34	87	212	5
137	79	7.4	141.6	59	1	146	39	72	201	5
161	88	7	185.6	60	0.9	215	41	109	487	10
138	66		168.6	62	0.8					7
141	75	6.9	256	64	1.4	163	61	91	51	7
126	67	7	159.6	66	6.6	229	36	164	189	8
154	79	7	167.6	47	0.8	202	58	126	114	8
155	97	8	154.6	47	0.7	228	36	159	213	6
163	99	6.5	169.6	47	0.7	220	68	135	86	8
139	76	7	200.6	47	1.1	195	60	132	75	8
136	75	7	125	48	0.8	159	45	106	75	8
120	73		145.6	48	0.9	131	30	84	176	5
130	90	7.2	178.6	48	1.2	155	48	82	190	7
136	85		208.6	92	0.7	150	50	78	93	8
146	83	7	234	93	2.1	223	35	144	194	6
114	63	7.3	185	44	2.4	207	33	147	240	5
130	70		153.6	32	0.8	195	46	130	116	4
139	84	6.7	152	34	0.8	153	39	91	156	7
130	79	7	138	36	1.3	183	46	112	154	7
174	86	6.1	119.6	40	0.9	211	46	140	144	7
131	69	7	152.6	43	1	224	64	152	68	8
125	73		150.6	50	0.9	209	69	129	91	7
169	76	7	162	52	1	162	55	74	261	8
112	68	7.5	165.6	54	1	161	46	88	203	15
84	58		164.6	57	0.9	158	34	87	212	4
137	79	7.4	141.6	59	1	146	39	72	201	4
161	88		185.6	60	0.9	215	41	109	487	10
138	66		168.6	62	0.8					7
141	75	6.9	256	64	1.4	163	61	91	51	7
126	67	7	159.6	66	6.6	229	36	164	189	8
154	79	7	167.6	47	0.8	202	58	126	114	8
155	97	8	154.6	47	0.7	228	36	159	213	6
163	99		169.6	47	0.7	220	68	135	86	8
139	76	7	200.6	47	1.1	195	60	132	75	8
135	70	7.2	169.6	156	1.1	134	64	61	59	7
166	99		148.6	67	0.9	200	39	140	207	11
124	70		159	80	1	197	39	125	169	6
111	64	7.3	185.6	84	1.1	228	38	130	245	8
126	70		206.6	49	0.8	287	62	197	104	7
132	72	8.9	207.6	50	1.1	161	24	104	220	7
150	83	8	180	78	1.2	151	44	86	81	10
152	76	6.7	135	18	1	193	60	129	78	8
112	64		118.6	55	0.9	135	33	83	104	4
141	88	6.9	176	18	1.9					7
116	78		142.6	20	1.2	201	63	124	89	10
169	92	6	128.6	24	0.9	281	46	193	139	8
126	67		126	24	0.8	140	43	82	107	10
106	50		153	28	0.8	161	34	100	137	6
220	101	8	129	28	1.4	186	54	116	93	6
160	88	9.5	127	36	0.9	170	34	101	212	11
129	72		201	37	1.3	198	50	128	101	6
159	85		215	37	1.9	172	58	106	48	7
159	76	7	188.6	39	0.8	153	32	99	117	9
158	85		143	39	0.7	211	44	125	299	7
150	72	6	177.6	40	0.9	198	73	103	136	4
177	97		137	40	1.4	160	44	78	274	6
133	67	7	182.6	42	1.3	208	42	138	207	7
169	92	6	128.6	24	0.9	214	45	142	122	7
126	67		126	24	0.8	196	45	111	196	10
106	50		153	28	0.8	255	47	185	179	6
220	101	8	129	28	1.4	222	54	144	127	7
160	88	9.5	127	36	0.9	216	53	155	120	4
129	72		201	37	1.3	233	44	168	104	4
159	85		215	37	1.9	222	54	144	127	7
147	80		217	144	0.9	134	64	61	59	7
161	77	7	183	144	1.7	200	39	140	207	7
135	55	8.9	169.6	145	0.8	197	39	125	169	6
210	100	7	164.6	146	3.1	228	38	130	245	9
180	90	9	173.6	147	3.5	287	62	197	104	4
124	68		168.6	152	0.7	161	24	104	220	4
200	100	8	186.6	77	1	151	44	86	81	10
134	59		217	159	1.2	193	60	129	78	9
121	70		166.6	87	0.9	135	33	83	104	5
141	85	8.1	137	54	1	162	55	74	261	9
166	94	5.9	163.6	54	1	161	46	88	203	9
135	75		131	55	0.9	158	34	87	212	4
118	63	10	169	56	1	146	39	72	201	4
140	81	6	207	57	0.9	215	41	109	487	10
170	95	8.3	163	44	1.1	134	64	61	59	7
114	69	7	135.6	46	0.9	200	39	140	207	14
146	81	9	167.6	46	1	197	39	125	169	6
110	70		145.6	81	1.1	228	38	130	245	9
169	79	7	187.6	40	0.8	287	62	197	104	7
114	63	7.3	185	44	1.1	161	24	104	220	7
94	55		213.6	110	1	182	32	61	59	7
126	79	6.5	146	113	1	159	50	140	207	14
130	77		136.6	46	0.9	184	41	125	169	6
135	70	7.2	174.6	115	1.1	209	51	130	245	9
166	99		133.6	66	1.2	181	81	197	104	7
124	70		194	27	1.2	152	45	124	89	10
111	64	7.3	150	56	0.8	243	55	123	150	10
126	70		170	120	2	123	49	100	145	6
132	72	8.9	162	120	0.9	217	39	119	149	9
150	83	8	200.6	112	0.8	225	31	152	275	13
152	76	6.7	180.6	104	1	178	37	140	207	8
112	64	8	226.6	121	1.2	175	41	125	169	6
141	88	8.4	189.6	121	0.7	171	72	130	245	9
130	77		160	124	1.2	193	37	197	104	7
135	70	7.2	163	66	1.1	140	61	104	220	7
166	99		150.6	88	1.2	159	46	86	81	10
124	70	8	182.6	135	0.7	206	56	129	78	8
111	64	7.3	180.6	120	1	178	37	140	207	9
166	99		135	8	1	193	36	76	97	10
124	70	8	118.6	13	0.9	135	39	116	259	8
111	64	7.3	176	18	1.9		54	158	122	6
126	70	8	142.6	20	1.2	201	39	76	130	6
132	72	8.9	130.6	27	1.2	188	88	65	182	7
152	76	6.7	165.6	27	0.8	185	49	134	149	9
112	64	6.8	142	30	1	193	40	149	236	13
141	88	6.9	187.6	40	1.7	242	29	82	149	7
130	77	7.7	185	44	2.4	207	30	123	158	7
135	70	7.2	153.6	32	0.8	195	33	136	159	5
166	99	8	154	55	1.2	188	88	65	182	7
110	70	8.9	159.6	39	0.5	210	37	143	224	6
120	65	7.8	195.6	39	0.9	181	46	75	347	8
110	70	7.9	139.6	40	1.4	220	44	144	185	11
125	67	7	153	89	1	151	31	100	83	8
138	68	7.1	212	40	0.8	202	52	128	102	7
130	80	8.9	196.6	106	1.3	193	57	112	161	4
100	67	8	178	67	0.8	224	48	163	70	5
156	79	8.9	155	88	0.7	224	41	148	261	4
89	46	9	142	58	0.8	178	76	88	74	6
135	66	7.9	187.6	30	1	193	56	119	149	6
169	79	8	165	40	1.7	242	37	152	275	7
144	74	7.6	130.6	44	1.2	188	48	123	150	10
130	83	8	165.6	77	0.8	185	55	100	145	6
135	66	7.9	142	30	1	193	56	119	149	9
126	79	6.5	214.6	36	0.9	161	24	104	220	7
130	77	8	193.6	43	0.9	151	44	86	81	10
135	70	7.2	169.6	56	1.1	193	60	129	78	8
166	99	7	148.6	66	0.9	135	33	83	104	5
124	70	8	159	79	1	201	63	124	89	10
